# Supplementary material for: Atomic resolution analyses of the binding of xylobiose-derived deoxynojirimycin and isofagomine to xylanase Xyn10AElectronic supplementary information (ESI) available: kinetics and structural methods. See http://www.rsc.org/suppdata/cc/b4/b405152a/
Source: Royal Society of Chemistry journal article supplement (doi:10.1039/b405152a), 2004-01-01
Supplement: b405152a.doc [file b405152a.doc]

# Supplementary Material (ESI) for Chemical Communications

# This journal is © The Royal Society of Chemistry 2004


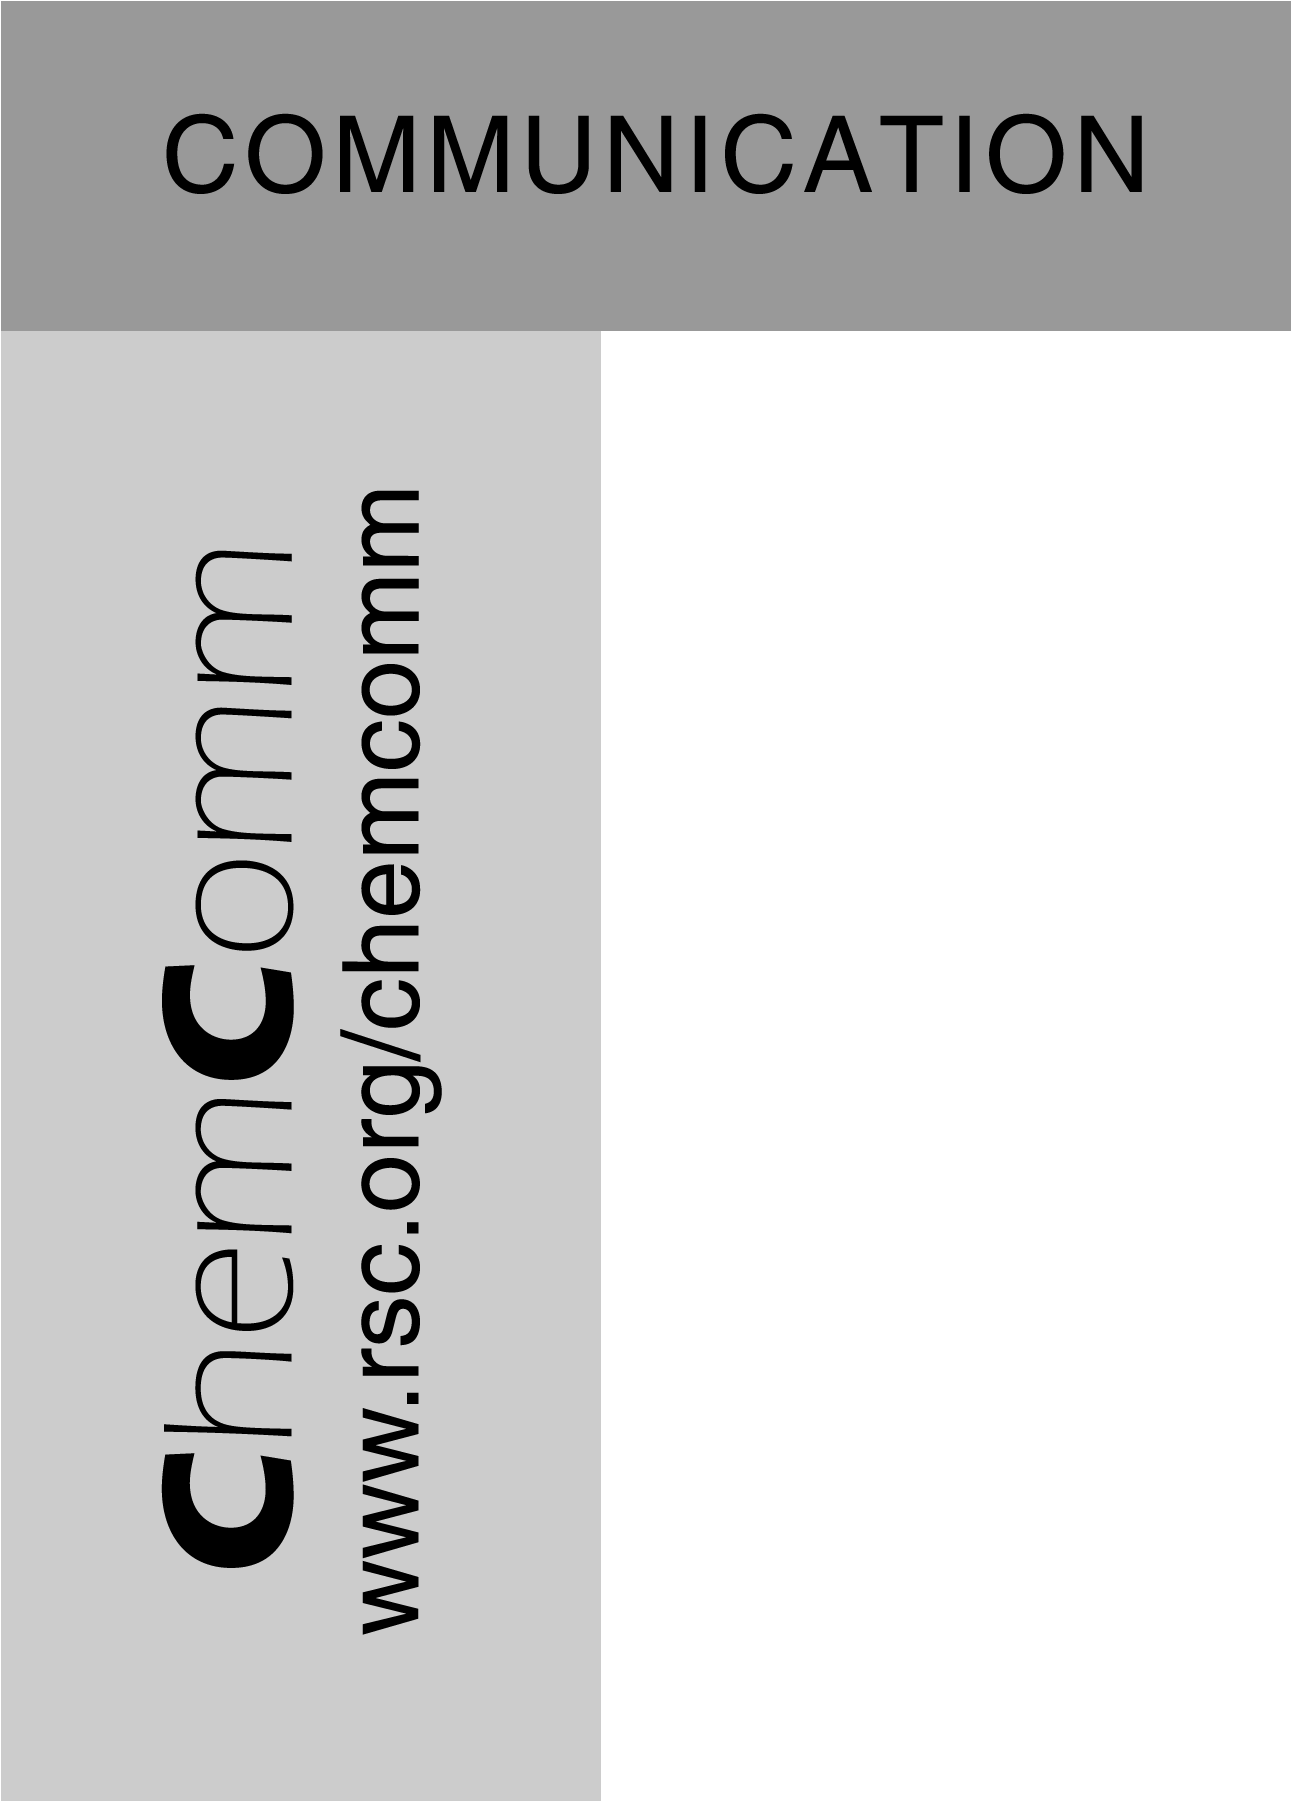
Atomic resolution analyses of the binding of xylobiose-derived deoxynojirimycin and isofagomine to xylanase Xyn10A†

Tracey M. Gloster,*a* Spencer J. Williams, *b* Shirley Roberts,*a* Chris A. Tarling**,** *c* **Jacqueline Wicki,***c* Stephen G. Withers*c* and Gideon J. Davies**a*

a Structural Biology Laboratory, Department of Chemistry, The University of York, Heslington, UK, Y010 5YW. E-mail: davies@ysbl.york.ac.uk

b School of Chemistry, University of Melbourne, Parkville, Australia 3010.

*c Department of Chemistry, 2036 Main Mall, University of British Columbia, Vancouver, Canada V6T 1Z1.*

This submission was created using the RSC ChemComm Template (DO NOT DELETE THIS TEXT)

(LINE INCLUDED FOR SPACING ONLY - DO NOT DELETE THIS TEXT)

# Reaction Kinetics and Enzyme Inhibition

Xyn10A kinetics and *K*i determinations were performed using *p*NP-xylobioside as substrate with release of the *p*-nitrophenolate anion measured at 400 nm. All reactions were performed at 37 C and contained 1 mg mL-1 BSA. The pH vs *k*cat/*K*M profile was determined via the substrate depletion method, with substrate present at less than 1/10 *K*M. *K*i values at each pH were determined from Dixon plots using inhibitor concentrations spanning 1/3 to 3 times the *K*i and a *p*NP-xylobioside concentration of 0.24 mM. The kinetic data were fitted using GRAFIT 5.0 (Erithacus Software Ltd. Horley, UK).

# Structure Solution and Refinement

Crystals of Xyn10A were grown from 20 mg mL-1 protein (in water) with 16-20% polyethylene glycol monomethyl ether 5000, 5% isopropanol and either 0.1 M 2-(N-morpholino)-ethanesulfonic acid, pH 5.8 or 0.1 M imidazole, pH 7.5. A small quantity of solid **3** or **4** was added to the liquor surrounding a single crystal, soaked for 3 minutes and cryogenically frozen. Data were collected from a single crystal at 100 K in a stream of N2 gas on European Synchrotron Radiation Facility beamlines ID14-1 (**3**, pH 5.8 and pH 7.5), ID29 (**4**, pH 5.8) and ID14-4 (**4**, pH 7.5). Data were processed and scaled using the HKL suite1 (**3** at pH 5.8 and 7.5, **4** at pH 5.8) or MOSFLM2 and SCALA3 (**4** at pH 7.5). The models were refined with cycles of REFMAC4 and other programs from the CCP4 suite5 interspersed with model building in QUANTA (Accelrys, San Diego Ca, USA). At both pH 5.8 and 7.5 a second molecule of **3** is present in the +1 and +2 subsites. This molecule is present at very low occupancy (<0.1) and cannot be modelled appropriately.

**Table I.** X-ray data and structure quality for Xyn10A complexes with **3** and **4** at pH 5.8 and 7.5

|  | **3** | | **4** | |
| --- | --- | --- | --- | --- |
| pH | 5.8 | 7.5 | 5.8 | 7.5 |
| Resolution (Å) | 30-1.03 (1.05-1.03) | 20-1.07 (1.11-1.07) | 30-0.98 (1.02-0.98) | 23-1.1 (1.16-1.10) |
| Rmerge | 0.047 (0.415) | 0.063 (0.466) | 0.058 (0.406) | 0.079 (0.217) |
| Data completeness (%) | 97.1 (93.7) | 94.4 (81.2) | 93.4 (89.1) | 95.1 (70.4) |
| Structure Rcryst | 0.120 | 0.098 | 0.118 | 0.103 |
| Structure Rfree | 0.142 | 0.121 | 0.137 | 0.124 |
| Structure rmsd (bonds/ Å) | 0.016 | 0.014 | 0.014 | 0.015 |
| PDB code | 1v0k | 1v0m | 1v0l | 1v0n |

*a* outer resolution bin statistics are given in parentheses; rmsd., root mean square deviation

Notes and References

1 Z. Otwinowski and W. Minor, *Methods Enzymol*, 1997, **276**, 307

2 A. G. W. Leslie, *Joint CCP4 + ESF-EAMCB Newsletter on Protein Crystallography*, 1992, **26**.

3 P. R. Evans, *Proceedings of CCP4 Study Weekend on Data Collection & Processing*, 1993, 114.

4 G. N. Murshudov, A. A. Vagin, and E. J. Dodson, *Acta Cryst*, 1997, **D 53**, 240.

5 Collaborative Computational Project Number 4, *Acta Cryst.*, 1994, **D50**, 760
